# Supplementary material for: Valence-band hybridization in sulphides
Source: Royal Society of Chemistry journal article supplement (doi:10.1039/d4cp02894e), 2024-01-01
Supplement: d4cp02894e1.pdf [file d4cp02894e1.pdf]

# Supporting Information

## Valence-band hybridization in sulphides

Lothar Weinhardt<sup>1,2,3</sup>, Dirk Hauschild<sup>1,2,3</sup>, Constantin Wansorra<sup>1,3</sup>, Ralph Steininger<sup>1</sup>, Monika Blum<sup>3,4,5</sup>, Wanli Yang<sup>4</sup>, and Clemens Heske<sup>1,2,3</sup>

<sup>1</sup>Institute for Photon Science and Synchrotron Radiation (IPS), Karlsruhe Institute of Technology (KIT), Kaiserstraße 12, 76131 Karlsruhe, Germany

<sup>2</sup>Institute for Chemical Technology and Polymer Chemistry (ITCP), Karlsruhe Institute of Technology (KIT), Kaiserstraße 12, 76131 Karlsruhe, Germany

<sup>3</sup>Department of Chemistry and Biochemistry, University of Nevada, Las Vegas (UNLV), 4505 Maryland Parkway, Las Vegas, NV 89154-4003, United States

<sup>4</sup>Advanced Light Source (ALS), Lawrence Berkeley National Laboratory, 1 Cyclotron Road, Berkeley, CA 94720, USA

<sup>5</sup>Chemical Sciences Division, Lawrence Berkeley National Laboratory, 1 Cyclotron Road, Berkeley, CA 94720, USA

### AUTOMATED INTENSITY AND ENERGY POSITION DETERMINATION

Band structures, (projected) density of states (PDOS), and calculated spectra are first loaded for all  $U_{d,eff}$  and  $U_{p,eff}$ . In the first step of the automated evaluation illustrated in Figure S1, the centre energies  $E_1$  and  $E_2$  between the “S 3 derived” (short “3s”), “metal d derived” (short “d”), and “S 3p derived” (short “3p”) bands, as well as the electronic band gap energy  $E_{Gap}$  are determined. In the second step, these energies are used to determine the intensities

$$I_{3s,SL} = \sum_{E=E_{min}}^{E_1} I_{SL}(E), \quad I_{d,SL} = \sum_{E=E_1}^{E_2} I_{SL}(E)$$
$$I_{d,SK} = \sum_{E=E_1}^{E_2} I_{SK}(E), \quad \text{and} \quad I_{3p,SK} = \sum_{E=E_2}^0 I_{SK}(E).$$

Likewise, the centre of mass energies  $E_{COM}$  are determined as:

$$E_{3s,COM,SL} = \sum_{E=E_{min}}^{E_1} I_{SL}(E) \cdot E / I_{3s,SL}, \quad E_{d,COM,SL} = \sum_{E=E_1}^{E_2} I_{SL}(E) \cdot E / I_{d,SL}$$

# Supporting Information

$$E_{d,COM,SK} = \sum_{E=E_1}^{E_2} I_{SK}(E) \cdot E / I_{d,SK}, \text{ and } E_{3p,COM,SK} = \sum_{E=E_2}^0 I_{SK}(E) \cdot E / I_{3p,SK}.$$

In the third step, the spectra are broadened with a Voigt function, using Gaussian and Lorentzian widths adjusted to best reproduce the experimental spectra. Then, the maxima in the regions defined by  $E_1$  and  $E_2$  give the respective  $E_{I_{max}}$  energies.

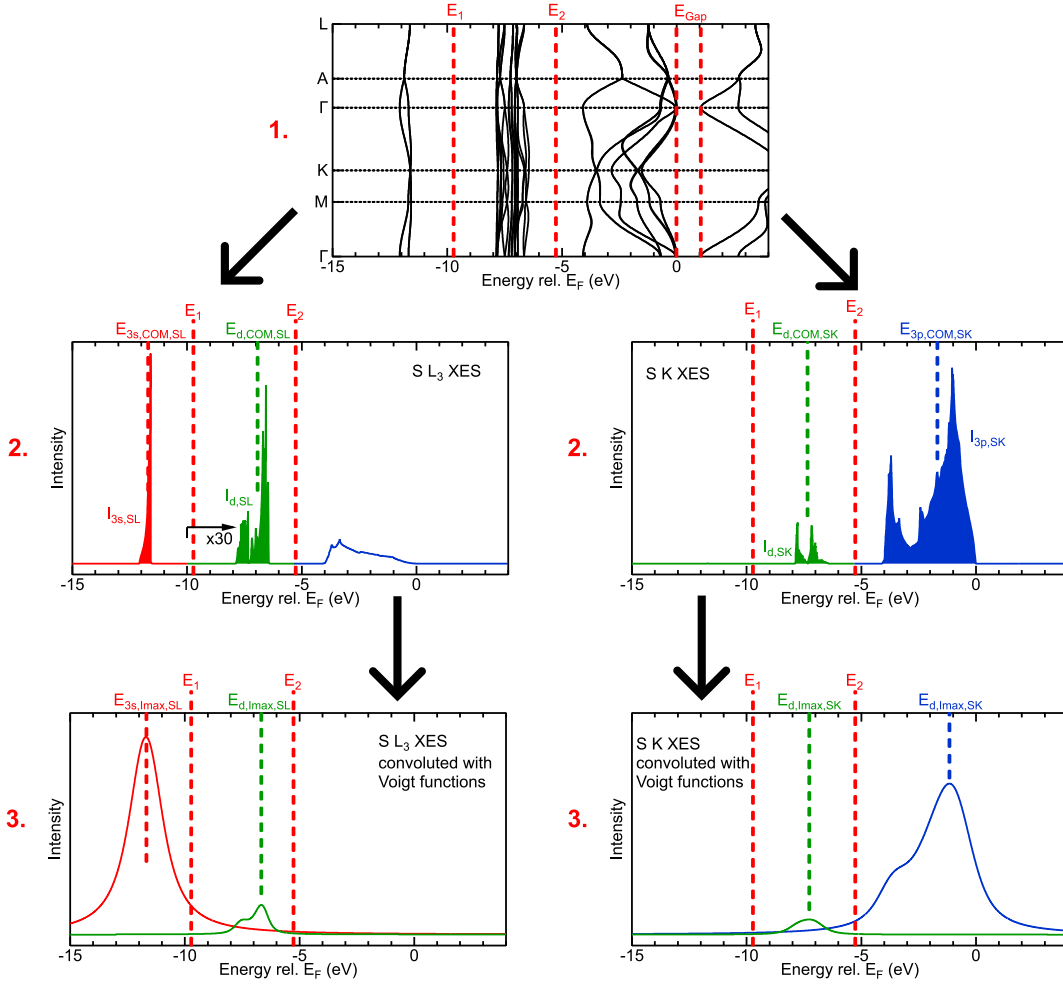

**Figure S1:** Illustration of steps 1 to 3 of the automated evaluation of the DFT calculation data for S L<sub>2,3</sub> (left) and S K (right) XES.

## TWO STATE HYBRIDIZATION MODEL

As a simple model, we describe the hybrid *bands* as hybrid *orbitals* formed by hybridization of “atomic” S 3s, S 3p, and metal d orbitals with wave functions  $\varphi_{S\ 3s}$ ,  $\varphi_{S\ 3p}$ , and  $\varphi_d$ , respectively. We limit the model to hybrid orbitals formed by two separate orbital “pairs”, i.e., S 3s with metal d and metal d with S 3p, respectively. Analogous to the treatment of the hydrogen molecule by Heitler and London<sup>1</sup>, we then assume that the wave

# Supporting Information

function  $\psi_x$  of the hybrid orbital  $x$  can be described as a linear combination of the “atomic” orbitals. For hybridization between the S 3s and metal d orbitals, this gives us  $\psi_x = c_1\varphi_{S\ 3s} + c_2\varphi_d$ . With the Schrödinger equation, the Hamiltonian  $\hat{H}$  of the system, and the energy  $E_x$  of the hybrid orbital  $x$ , we obtain

$$\langle \psi_x | \hat{H} | \psi_x \rangle = \langle \psi_x | E_x | \psi_x \rangle$$

$$E_x = \frac{\langle \psi_x | \hat{H} | \psi_x \rangle}{\langle \psi_x | \psi_x \rangle} = \frac{\langle c_1\varphi_{S\ 3s} + c_2\varphi_d | \hat{H} | c_1\varphi_{S\ 3s} + c_2\varphi_d \rangle}{\langle c_1\varphi_{S\ 3s} + c_2\varphi_d | c_1\varphi_{S\ 3s} + c_2\varphi_d \rangle} = \frac{c_1^2\epsilon_{S\ 3s} + 2c_1c_2\beta + c_2^2\epsilon_d}{(c_1^2 + 2c_1c_2S + c_2^2)}$$

with the Coulomb integrals  $\langle \varphi_i | H | \varphi_i \rangle = \epsilon_i$ , the resonance integrals  $\langle \varphi_i | H | \varphi_j \rangle = \beta_{ij}$ , and the overlap integrals  $\langle \varphi_i | \varphi_j \rangle = S_{ij}$  (with  $S_{ii} = 1$ ). To find values for  $c_1$  and  $c_2$  that minimize the energy  $E_x$ , we use the variational Ritz method<sup>2</sup> by setting the partial derivatives to 0:

$$\frac{\partial E_x}{\partial c_1} = 0: c_1(\epsilon_{S\ 3s} - E_x) + c_2(\beta_{3s\ d} - E_x S_{3s\ d}) = 0 \quad (1)$$

$$\frac{\partial E_x}{\partial c_2} = 0: c_1(\beta_{3s\ d} - E_x S_{3s\ d}) + c_2(\epsilon_d - E_x) = 0 \quad (2)$$

This homogeneous system of linear equations only has a non-trivial solution if the determinant is zero, i.e., if

$$(\epsilon_{S\ 3s} - E_x)(\epsilon_d - E_x) - (\beta_{3s\ d} - E_x S_{3s\ d})^2 = 0.$$

As expected, this gives us two solutions for  $E_x$ , i.e., two hybrid orbitals which we name according to Figure 6 in the main paper. Since we do not require an explicit form of the energies, they can be given in a compact implicit form:

$$E_{ds} = \epsilon_d + \frac{(\beta_{S\ 3s\ d} - E_{ds} S_{S\ 3s\ d})^2}{E_{ds} - \epsilon_{S\ 3s}}$$

$$E_{sd} = \epsilon_{S\ 3s} - \frac{(\beta_{S\ 3s\ d} - E_{sd} S_{S\ 3s\ d})^2}{\epsilon_d - E_{sd}}$$

From equations (1) and (2), we derive the following conditions for the coefficients:

$$c_1 = c_2 \frac{\beta_{S\ 3s\ d} - E_{ds} S_{S\ 3s\ d}}{E_{ds} - \epsilon_{S\ 3s}} \quad \text{and} \quad c_2 = c_1 \frac{\beta_{S\ 3s\ d} - E_{sd} S_{S\ 3s\ d}}{\epsilon_d - E_{sd}}$$

Introducing normalization factors  $N_{ds}$  and  $N_{sd}$ , we can now write the wave functions of the two hybrid orbitals:

$$\psi_{ds} = N_{ds} \left( \frac{\beta_{S\ 3s\ d} - E_{ds} S_{S\ 3s\ d}}{E_{ds} - \epsilon_{S\ 3s}} \varphi_{S\ 3s} + \varphi_d \right)$$

$$\psi_{sd} = N_{sd} \left( \varphi_{S\ 3s} - \frac{\beta_{S\ 3s\ d} - E_{sd} S_{S\ 3s\ d}}{\epsilon_d - E_{sd}} \varphi_d \right)$$

# Supporting Information

In the same way, we derive the energies and wave functions for hybridization of the metal d with the S 3p levels:

$$E_{dp} = \epsilon_d - \frac{(\beta_{S\ 3p\ d} - E_{dp} S_{S\ 3p\ d})^2}{\epsilon_{S\ 3p} - E_{dp}}$$

$$E_{pd} = \epsilon_{S\ 3p} + \frac{(\beta_{S\ 3p\ d} - E_{pd} S_{S\ 3p\ d})^2}{E_{pd} - \epsilon_d}$$

$$\psi_{dp} = N_{dp} \left( \varphi_d - \frac{\beta_{S\ 3p\ d} - E_{dp} S_{S\ 3p\ d}}{\epsilon_{S\ 3p} - E_{dp}} \varphi_{S\ 3p} \right)$$

$$\psi_{pd} = N_{sd} \left( \frac{\beta_{S\ 3p\ d} - E_{pd} S_{S\ 3p\ d}}{E_{pd} - \epsilon_d} \varphi_d + \varphi_{S\ 3p} \right)$$

The emission intensity of photons of energy  $E$  generated by transitions from an initial state  $|i\rangle$  to a final state  $|f\rangle$  is proportional to  $E^3 |\langle f|\hat{x}|i\rangle|^2$ , as derived by Dirac<sup>3,4</sup>. With the S 2p wave function  $\varphi_{S\ 2p}$ , the ‘‘S 3s bands’’ represented by the ‘‘sd’’ orbital, the ‘‘metal d bands’’ by the ‘‘ds’’ and ‘‘dp’’ orbitals, and the ‘‘S 3p bands’’ by the ‘‘pd’’ orbital, we can now simulate the area ratios within our model. For S L<sub>2,3</sub> XES, this gives

$$\frac{I_{d,SL}}{I_{3s,SL}} \approx \frac{I_{ds} + I_{dp}}{I_{sd}} = \frac{(E_{ds} - E_{S\ 2p})^3 |\langle \psi_{ds} | \hat{x} | \varphi_{S\ 2p} \rangle|^2 + (E_{dp} - E_{S\ 2p})^3 |\langle \psi_{dp} | \hat{x} | \varphi_{S\ 2p} \rangle|^2}{(E_{sd} - E_{S\ 2p})^3 |\langle \psi_{sd} | \hat{x} | \varphi_{S\ 2p} \rangle|^2}$$

$$= \frac{(E_{ds} - E_{S\ 2p})^3 N_{ds}^2 \left| \left\langle \frac{\beta_{S\ 3s\ d} - E_{ds} S_{S\ 3s\ d}}{E_{ds} - \epsilon_{S\ 3s}} \varphi_{S\ 3s} + \varphi_d \right| \hat{x} \left| \varphi_{S\ 2p} \right\rangle \right|^2 + (E_{dp} - E_{S\ 2p})^3 N_{dp}^2 \left| \left\langle \varphi_d - \frac{\beta_{S\ 3p\ d} - E_{dp} S_{S\ 3p\ d}}{\epsilon_{S\ 3p} - E_{dp}} \varphi_{S\ 3p} \right| \hat{x} \left| \varphi_{S\ 2p} \right\rangle \right|^2}{(E_{sd} - E_{S\ 2p})^3 N_{sd}^2 \left| \left\langle \varphi_{S\ 3s} - \frac{\beta_{S\ 3s\ d} - E_{sd} S_{S\ 3s\ d}}{\epsilon_d - E_{sd}} \varphi_d \right| \hat{x} \left| \varphi_{S\ 2p} \right\rangle \right|^2}$$

With  $\langle \varphi_{S\ 3p} | \hat{x} | \varphi_{S\ 2p} \rangle = 0$  due to the dipole selection rules and assuming  $\langle \varphi_d | \hat{x} | \varphi_{S\ 2p} \rangle \ll \langle \varphi_{S\ 3s} | \hat{x} | \varphi_{S\ 2p} \rangle$ , as also suggested by the vanishing contribution of d symmetry to the S PDOS, we obtain

$$\frac{I_{d,SL}}{I_{3s,SL}} \approx \frac{(E_{ds} - E_{S\ 2p})^3 N_{ds}^2 \left( \frac{\beta_{S\ 3s\ d} - E_{ds} S_{S\ 3s\ d}}{E_{ds} - \epsilon_{S\ 3s}} \right)^2 |\langle \varphi_{S\ 3s} | \hat{x} | \varphi_{S\ 2p} \rangle|^2}{(E_{sd} - E_{S\ 2p})^3 N_{sd}^2 |\langle \varphi_{S\ 3s} | \hat{x} | \varphi_{S\ 2p} \rangle|^2} = \frac{(E_{ds} - E_{S\ 2p})^3 N_{ds}^2 (\beta_{S\ 3s\ d} - E_{ds} S_{S\ 3s\ d})^2}{(E_{sd} - E_{S\ 2p})^3 N_{sd}^2 (E_{ds} - \epsilon_{S\ 3s})^2}.$$

Within our model, we approximate  $dE_{COM} \approx E_{ds} - E_{sd}$  for the S L<sub>2,3</sub> emission, and thus

$$E_{ds} - \epsilon_{S\ 3s} = E_{ds} - E_{sd} - \frac{(\beta_{S\ 3s\ d} - E_{sd} S_{S\ 3s\ d})^2}{\epsilon_d - E_{sd}} \approx dE_{COM} - \frac{(\beta_{S\ 3s\ d} - E_{sd} S_{S\ 3s\ d})^2}{\epsilon_d - E_{sd}}.$$

We further approximate  $\frac{(\beta_{S\ 3s\ d} - E_{sd} S_{S\ 3s\ d})^2}{\epsilon_d - E_{sd}} = \Delta E_{sd}$  to be independent of  $dE_{COM}$  and derive

$$\frac{I_{d,SL}}{I_{3s,SL}} \approx \frac{(E_{ds} - E_{S\ 2p})^3 N_{ds}^2 (\beta_{S\ 3s\ d} - E_{ds} S_{S\ 3s\ d})^2}{(E_{sd} - E_{S\ 2p})^3 N_{sd}^2 (dE_{COM} - \Delta E_{sd})^2}.$$

# Supporting Information

We now define the constant  $C_{ds} = \frac{N_{ds}^2}{N_{sd}^2} (\beta_{S3sd} - E_{ds} S_{S3sd})^2$ . Using the Hückel approximation ( $S_{S3sd} = 0$ ) this simplifies to  $C_{ds} \approx \frac{N_{ds}^2}{N_{sd}^2} \beta_{S3sd}^2$ , which we assume to be mostly independent of  $dE_{COM}$ .  $C_{ds}$  contains the wave function normalization constants and the resonance integral  $\beta_{S3sd}$ , which might be interpreted as a measure for the bonding strength between S 3s and the metal d states. Furthermore, we approximate  $\frac{(E_{ds} - E_{S2p})^3}{(E_{sd} - E_{S2p})^3} \approx 1 + 3 \frac{dE_{COM}}{E_{sd} - E_{S2p}} \approx 1$ , giving

$$\frac{I_{d,SL}}{I_{3s,SL}} \approx \frac{C_{ds}}{(dE_{COM} - \Delta E_{sd})^2}.$$

Similarly, we derive an approximation for the intensity ratio of the “metal d bands” and the “S 3p bands” in the S K emission:

$$\frac{I_{d,SK}}{I_{3p,SK}} \approx \frac{C_{dp}}{(dE_{COM} - \Delta E_{pd})^2}.$$

## REFERENCES

- (1) Heitler, W.; London, F. Wechselwirkung neutraler Atome und homöopolare Bindung nach der Quantenmechanik. *Z. Für Phys.* **1927**, *44* (6), 455–472. <https://doi.org/10.1007/BF01397394>.
- (2) Ritz, W. Über eine neue Methode zur Lösung gewisser Variationsprobleme der mathematischen Physik. *Reine Angew Math* **1909**, *1909* (135), 1–61. <https://doi.org/10.1515/crll.1909.135.1>.
- (3) Dirac, P. A. M. The Quantum Theory of the Emission and Absorption of Radiation. *Proc. R. Soc. Lond. Ser. Contain. Pap. Math. Phys. Character* **1927**, *114* (767), 243–265. <https://doi.org/10.1098/rspa.1927.0039>.
- (4) Dirac, P. A. M. *The Principles of Quantum Mechanics*, Third Edition.; International Series of Monographs on Physics; Oxford University Press: Oxford, New York, 1948.
